# Supplementary material for: Transradial Approach for Aortoiliac and Femoropopliteal Interventions: A Systematic Review and Meta-analysis
Source: PubMed Central journal article supplement — J Endovasc Ther. 2018 Aug 8;25(5):599–607. doi: 10.1177/1526602818792854 (PMC6136071; doi:10.1177/1526602818792854), 2018-08-08
Supplement: 18-0085_Supplementary_Tables.pdf [file 18-0085_Supplementary_Tables.pdf]

**Transradial Approach for Aortoiliac and Femoropopliteal Interventions: A Systematic Review and Meta-analysis.**

Meertens et al. *J Endovasc Ther.* 2018;25(5).

**Supplementary Table 1.** Additional Intervention Materials.

|                  | Access Sheath Size, Length, mm | Diagnostic Catheter Size, Length, cm | Guidewire Size, Length, cm | Crossing Wire Size, Length, mm | Intervention Sheath Size, Length, cm | Predilation Balloon, mm | Postdilation Balloon, mm | Stent Diameter/ Length, <sup>a</sup> mm |
|------------------|--------------------------------|--------------------------------------|----------------------------|--------------------------------|--------------------------------------|-------------------------|--------------------------|-----------------------------------------|
| Trani 2009       | 6-F, 25                        |                                      | 0.018", 300                | —                              | 180                                  | —                       | —                        | 6.9±0.2/<br>181±95                      |
| Staniloae 2010   | 5-F, short                     | 6-F, 110                             | 0.035", 300                | —                              | 6-F, 110                             | —                       | —                        | 9.30 (7–12)/ 51                         |
| Cortese 2012     | 6-F, short                     | 6-F, 125                             | 0.035", 260                | —                              | 7-F, 90 or<br>6.5-F, 120             | —                       | 130                      | (6–10)/—                                |
| Roy 2016         | —                              | —                                    | —                          | —                              | —                                    | —                       | —                        | —                                       |
| Lorenzoni 2011   | 6-F, 12                        | —                                    | 0.018", 300                | —                              | 6-F, 150                             | —                       | —                        | 6,7,8/—                                 |
| Cortese 2014     | —                              | 5-6-F, 100–<br>125                   | 0.035", 250–<br>300        | 0.018",<br>0.035"              | 6/7-F, 90–<br>120                    | 3–7×20–80<br>4–7×20–80  | —                        | —/—                                     |
| Lorenzoni 2014   | 5/6-F, 11                      | 8.5-F, 120<br>6-F, 125               | 0.035", 300                | 0.018", 400                    | —                                    | —                       | —                        | —/—                                     |
| Shinozaki 2014   | 6, short                       | Long pigtail                         | —                          | —                              | ?-F, 90<br>?-F, 120                  | —                       | —                        | —/135                                   |
| Coscas 2015      | 4, short                       | C2 or pigtail                        | 0.035", 260                | 0.035", 260                    | 6-F, 110                             | —                       | 135                      | —/135                                   |
| Ruzsa 2016       | —                              | 4-F, 150                             | 0.035", 260                | 0.018", 400                    | 5-F                                  | 180                     | 135                      | —/180                                   |
| Flachskampf 2005 | 8.5-F, 100<br>6-F, 120         | 5-F, 125<br>pigtail                  | 0.035" or<br>0.018"        | —                              | —                                    | n=42                    | Yes                      | —/135 and 120                           |
| Staniloae 2006   | 6-F, 90                        | 6-F, 125                             | 0.014", 300                | —                              | —                                    | —                       | 7×20                     | 10×60<br>10×30                          |

|                |           |                   |                            |   |                              |             |           |                        |
|----------------|-----------|-------------------|----------------------------|---|------------------------------|-------------|-----------|------------------------|
| Watanabe 2007  | 6-F, 105  | 6-F, 105          | 0.018" or 0.035"           | — | 6/105                        | 4×40        | 7×40      | 6×60, 10×40, 8×100/135 |
| Sanghvi 2008   | 5/6-F     | 5/6-F, 125        | 0.014", 300<br>0.035", 260 | — | 6/90                         | —           | —         | 8 (7–10) × 42 (20–60)  |
| Traini 2010    | 6-F, 25   | 6-F, 25           | 0.018", 300                | — | 180                          | 5×80        | 5×40      | 6×40/180               |
| Pitta 2011     | —         | —                 | 0.014", 300                | — | —                            | —           | —         | 8×57                   |
| Antov 2013     | 6/7-F, 11 | 5/6-F, 100 or 125 | 0.014" or 0.035", 180–300  | — | 5-F, 110<br>6-F, short or 90 | 1.5–7×20–30 | 5–8×20–59 | 6–9×15–68              |
| Harruna 2013   | 5-F, 11   | 4-F, 110 or 125   | 300                        | — | 9–12-F                       | 5×20        | 7×20      | 10×80                  |
| Shinozaki 2016 | 6-F, 105  | Microcatheter     | —                          | — | —                            | —           | —         | —                      |

Abbreviations: BE, balloon-expandable, SE, self-expanding.

<sup>a</sup>Data are presented as the means ± standard deviation (range) as available or individual dimensions.

## Transradial Approach for Aortoiliac and Femoropopliteal Interventions: A Systematic Review and Meta-analysis.

Meertens et al. *J Endovasc Ther.* 2018;25(5).

**Supplementary Table 2.** Definitions of Complications.

|                  | Bleeding Complications                                                              | Other Complications                                                                                                                        |
|------------------|-------------------------------------------------------------------------------------|--------------------------------------------------------------------------------------------------------------------------------------------|
| Trani 2009       | —                                                                                   | MAE (death, MI, stroke, distal embolism, vascular)                                                                                         |
| Staniloae 2010   | Persistent bleeding requiring additional compression hematocrit drop >10% or 3 g/dL | Local hematoma, MI                                                                                                                         |
| Cortese 2012     | TIMI bleeding criteria.                                                             | Reintervention, dissection, perforation                                                                                                    |
| Roy 2016         | Blood transfusion, hemoglobin drop >3 g/dL                                          | Perforation, occlusion, pseudoaneurysm, dissection, compartment syndrome, retroperitoneal hematoma, hematoma >5 cm, reintervention, stroke |
| Lorenzoni 2011   | TIMI bleeding criteria                                                              | Need for reintervention                                                                                                                    |
| Cortese 2014     | TIMI bleeding criteria                                                              | Closure, persisting dissection, perforation, stroke, renal failure, RAO                                                                    |
| Lorenzoni 2014   | Hemorrhagic                                                                         | Local requiring surgery, RAO                                                                                                               |
| Shinozaki 2014   | Bleeding without further definition, blood transfusion                              | Hematoma, stroke, cholesterol embolism, aortic dissection, perforation                                                                     |
| Coscas 2015      | —                                                                                   | Dissection, RAO, stroke                                                                                                                    |
| Ruzsa 2016       | Bleeding requiring transfusion, hemoglobin drop >3 g/dL                             | MAE, hematoma >2 cm or requiring intervention, pseudoaneurysm, access-site complication                                                    |
| Flachskampf 2005 | —                                                                                   | —                                                                                                                                          |
| Staniloae 2006   | —                                                                                   | —                                                                                                                                          |
| Watanabe 2007    | —                                                                                   | —                                                                                                                                          |
| Sanghvi 2008     | Bleedings without further definition                                                | Local, RAO                                                                                                                                 |
| Traini 2010      | Bleeding with resultant compartment syndrome                                        | RAO, hematoma, pseudoaneurysm, neuropathy, distal embolism, dissection                                                                     |
| Pitta 2011       | —                                                                                   | —                                                                                                                                          |
| Antov 2013       | —                                                                                   | —                                                                                                                                          |
| Harruna 2013     | —                                                                                   | —                                                                                                                                          |
| Shinozaki 2016   | —                                                                                   | —                                                                                                                                          |

Abbreviations: MAE, major adverse event; MI, myocardial infarction; RAO radial artery occlusion; TIMI thrombolysis in myocardial infarction.
